# Supplementary material for: Cooperative Regulation of Flagellar Synthesis by Two EAL-Like Proteins upon Salmonella Entry into Host Cells
Source: PubMed Central journal article supplement (PMC10100727; doi:10.1128/spectrum.02859-22), 2023-02-07
Supplement: spectrum.02859-22-s0001.pdf [file spectrum.02859-22-s0001.pdf]

## SUPPLEMENTAL MATERIALS

### **Cooperative Regulation of Flagellar Synthesis by Two EAL-like Proteins upon *Salmonella* Entry into Host Cell**

Yingying Yue<sup>a,b\*</sup>, Weiwei Wang<sup>a,b</sup>, Yue Ma<sup>a,b</sup>, Nannan Song<sup>a,b</sup>, Haihong Jia<sup>a,b</sup>, Cuiling Li<sup>a,b</sup>, Qi Wang<sup>a,b</sup>, Hui Li<sup>a,b</sup>, and Bingqing Li<sup>a,b,c,d,e\*</sup>

<sup>a</sup> Department of Clinical Laboratory, Shandong Provincial Hospital Affiliated to Shandong First Medical University, Jinan, 250021, Shandong, China;

<sup>b</sup> Department of Pathogen Biology, School of Basic Medicine, Shandong First Medical University & Shandong Academy of Medical Sciences, Jinan, 250062, China.

<sup>c</sup> Key Lab for Biotech-Drugs of National Health Commission, Jinan 250062, Shandong, China;

<sup>d</sup> Key Lab for Rare & Uncommon Diseases of Shandong Province, Jinan, 250062, Shandong, China.

<sup>e</sup> Institute of clinical microbiology, Shandong Academy of Clinical Medicine, Jinan, Shandong, China.

\*Correspondence: Address correspondence to Bingqing Li, [bingqingsdu@163.com](mailto:bingqingsdu@163.com), Yingying Yue, [yyy0513@163.com](mailto:yyy0513@163.com).

**Figure S1-S3**

**Table S1 S2**

**A**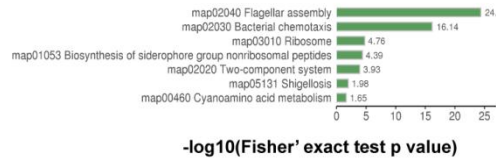**B**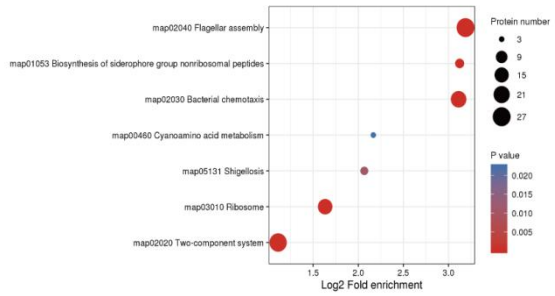

**Figure S1. KEGG enrichment analysis of the WT and  $\Delta\text{stm1344}$  strains pathways regulated in simulated host environment medium.**

Related biological function of all 7 pathways are displayed in bar (A) and dot (B), and bar height or dot size indicates the level of significance of enrichment. The flagella assembly is most significant.

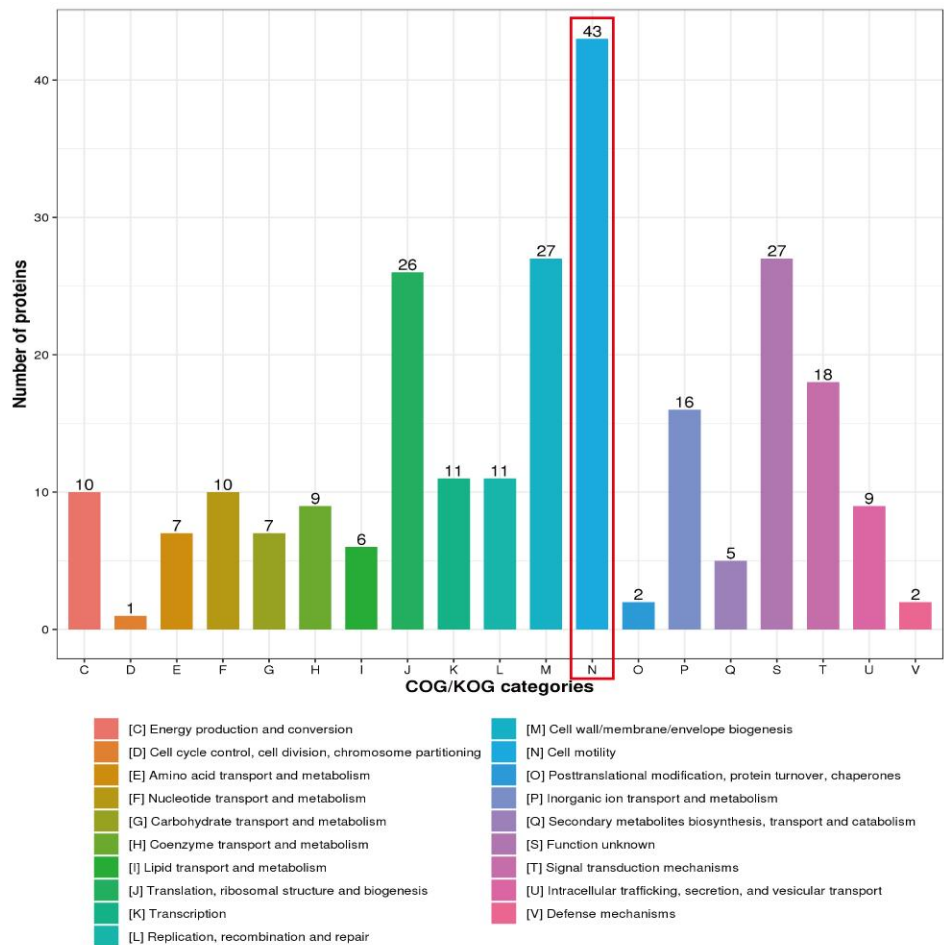

**Figure S2. COG/KOG categories analysis of the WT and  $\Delta stm1344$  strains in simulated host environment medium.**

Protein number with different functions are displayed in bar. The difference of cell motility related proteins represents the greatest significant.

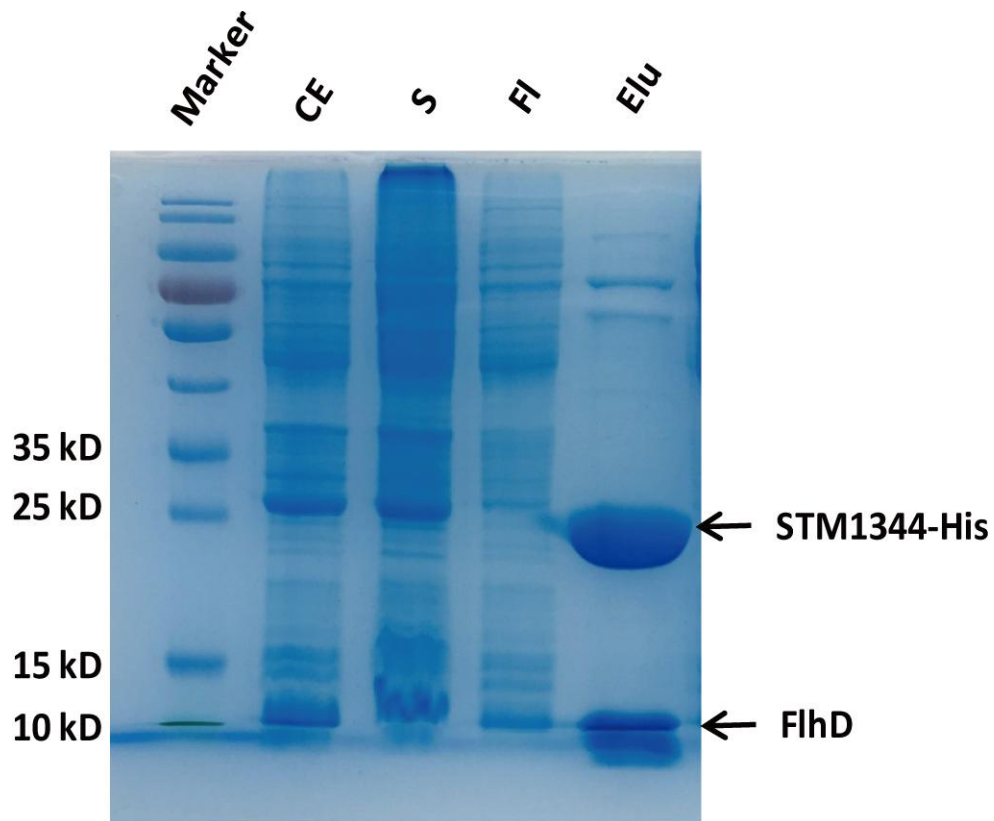

**Figure S3. The expression and purification of STM1344-FlhD complex.**

STM1344-FlhD complex samples were separated by SDS-PAGE and shown after coomassie blue staining. Lane Marker, protein marker; lane CE, the sample of cell lysate after induction; lane S, the supernatant of cell lysate after centrifugation; lane Fl, the sample flow through Ni-NTA affinity column; lane Elu, purified STM1344-FlhD complex.

**Table S1. Strains and plasmids used in this study**

| No | Strain/Plasmid                                            | Relevant characteristic(s)                                                     | Source                           |
|----|-----------------------------------------------------------|--------------------------------------------------------------------------------|----------------------------------|
| 1  | WT <i>Salmonella</i>                                      | <i>Salmonella enterica</i> serovar <i>Typhimurium</i> ATCC14028, no resistance | American Type Culture Collection |
| 2  | <i>Salmonella</i> $\Delta$ <i>stm1344</i>                 | <i>stm1344</i> knockout strain, no resistance                                  | This study                       |
| 3  | <i>Salmonella</i> $\Delta$ <i>stm1697</i>                 | <i>stm1697</i> knockout strain, no resistance                                  | [1]                              |
| 4  | <i>Salmonella</i> $\Delta$ <i>stm1344</i> <i>pstm1344</i> | <i>stm1344</i> knockout, <i>stm1344</i> /pBAD24, Amp <sup>+</sup>              | This study                       |
| 5  | <i>Salmonella</i> $\Delta$ <i>stm1344</i> <i>pM1</i>      | <i>stm1344</i> knockout, <i>stm1344</i> F181A & A184E/pBAD24, Amp <sup>+</sup> | This study                       |
| 6  | <i>E. coli</i> BL21(DE3)                                  | T7 expression host, no resistance                                              | Takara Bio Inc.                  |
| 7  | pGL01                                                     | Expression Vector, Amp <sup>+</sup>                                            | [2]                              |
| 8  | pET29b                                                    | Expression Vector, Kana <sup>+</sup>                                           | Biofeng Inc.                     |
| 9  | pBAD24                                                    | Expression Vector, Amp <sup>+</sup>                                            | Biofeng Inc.                     |
| 10 | STM1344/pGL01                                             | STM1344 cloned into pGL01                                                      | [1]                              |
| 11 | STM1697/pGL01                                             | STM1697 cloned into pGL01                                                      | [1]                              |
| 12 | stFlhD/pGL01                                              | stFlhD cloned into pGL01                                                       | [1]                              |
| 13 | stFlhD/pET29b                                             | stFlhD cloned into pET29b                                                      | [1]                              |
| 14 | STM1344/pBAD24                                            | STM1344 cloned into pBAD24                                                     | This study                       |
| 15 | STM1344 F181A&A184E /pBAD24                               | STM1344 F181A&A184E mutant protein expression construct into pBAD24            | This study                       |
| 16 | STM1344 F155Q/pGL01                                       | STM1344 F155Q mutant protein expression construct into pGL01                   | This study                       |
| 17 | STM1344 F155S/pGL01                                       | STM1344 F155S mutant protein expression construct into pGL01                   | This study                       |
| 18 | STM1344 F168Q/pGL01                                       | STM1344 F168Q mutant protein expression construct into pGL01                   | This study                       |
| 19 | STM1344 F168S/pGL01                                       | STM1344 F168S mutant protein expression construct into pGL01                   | This study                       |
| 20 | STM1344 E179R/pGL01                                       | STM1344 E179R mutant protein expression construct into pGL01                   | This study                       |
| 21 | STM1344 F181Q/pGL01                                       | STM1344 F181Q mutant protein expression construct into pGL01                   | This study                       |
| 22 | STM1344 F181S/pGL01                                       | STM1344 F181S mutant protein expression construct into pGL01                   | This study                       |
| 23 | STM1344 A184E/pGL01                                       | STM1344 A184E mutant protein expression construct into pGL01                   | This study                       |
| 24 | STM1344 F181Q&A184E /pGL01                                | STM1344 F181Q&A184E mutant protein expression construct into pGL01             | This study                       |
| 25 | STM1344 F181S&A184E / pGL01                               | STM1344 F181S&A184E mutant protein expression construct into pGL01             | This study                       |
| 26 | STM1344 F181A&A184E / pGL01                               | STM1344 F181A&A184E mutant protein expression construct into pGL01             | This study                       |

[1] Li B, Yue Y, Yuan Z, Zhang F, Li P, Song N, Lin W, Liu Y, Yang Y, Li Z, Gu L. 2017. *Salmonella* STM1697 coordinates flagella biogenesis and virulence by restricting flagellar master protein FlhD4C2 from recruiting RNA polymerase. *Nucleic Acids Research* 45:9976-9989.

[2] Li B, Li N, Wang F, Guo L, Huang Y, Liu X, Wei T, Zhu D, Liu C, Pan H, Xu S, Wang H-W, Gu L. 2012. Structural insight of a concentration-dependent mechanism by which YdiV inhibits *Escherichia coli* flagellum biogenesis and motility. *Nucleic Acids Research* 40:11073-11085.

**Table S2. Primers used in this study**

| No | Oligonucleotide  | Sequence                            | Application |
|----|------------------|-------------------------------------|-------------|
| 1  | gapa-5           | gaccttcgatgatgccgaag                | qPCR        |
| 2  | gapa-3           | gccaggacatcgttccaac                 | qPCR        |
| 3  | stm1344-5        | cagcagcgagctgaaatgatc               | qPCR        |
| 4  | stm1344-3        | cgaaacatcgctcagtatc                 | qPCR        |
| 5  | stm1697-5        | ccaccacgatctgtcac                   | qPCR        |
| 6  | stm1697-3        | ctgctgcccattagtttgc                 | qPCR        |
| 7  | flhD-5           | cgctcggtatcaacgaaga                 | qPCR        |
| 8  | flhD-3           | ctccgccagtttgaccatct                | qPCR        |
| 9  | fliA-5           | cttaccagtttggtgcg                   | qPCR        |
| 10 | fliA-3           | cgagcaactggtgtaac                   | qPCR        |
| 11 | fliZ-5           | cagaactggcggtaaaggg                 | qPCR        |
| 12 | fliZ-3           | cattcccacgatctgctgc                 | qPCR        |
| 13 | fliC-5           | cgcagtaaagagaggacg                  | qPCR        |
| 14 | fliC-3           | gggcaacaccgtaacaacc                 | qPCR        |
| 15 | STM1344-pGI01-F  | ATAGGATCCatgattgcttcacttgatgagc     | Gene Clone  |
| 16 | STM1344-pGI01-R  | ATACTCGAGTTAatcgctgaacgagtttaatgagc | Gene Clone  |
| 17 | STM1344-pBAD24-F | ATAGAATTcatgattgcttcacttgatg        | Gene Clone  |
| 18 | STM1344-pBAD24-R | AAGCTTAAGCTTTTaaacgagtttaatgagctggc | Gene Clone  |
| 19 | STM1344-F155Q-F  | acaaaagctattCAGgatgggcttttc         | Gene Clone  |
| 20 | STM1344-F155Q-R  | gaaaagcccatcCTGaatagcttttgt         | Gene Clone  |
| 21 | STM1344-F155S-F  | acaaaagctattAGCgatgggcttttc         | Gene Clone  |
| 22 | STM1344-F155S-R  | gaaaagcccatcGCTaatagcttttgt         | Gene Clone  |
| 23 | STM1344-F168Q-F  | ttgataaaaatCAGattcagcagcga          | Gene Clone  |
| 24 | STM1344-F168Q-R  | tcgctgctgaatCTGattttatccaa          | Gene Clone  |
| 25 | STM1344-F168S-F  | ttgataaaaatAGCattcagcagcga          | Gene Clone  |
| 26 | STM1344-F168S-R  | tcgctgctgaatGCTattttatccaa          | Gene Clone  |
| 27 | STM1344-E179R-F  | atgatctcattcCGAccattcatgcac         | Gene Clone  |
| 28 | STM1344-E179R-R  | gtgcatgaatggTCGaatgagatcat          | Gene Clone  |
| 29 | STM1344-F181Q-F  | tcattcgaaccaCAGatgcacgctatc         | Gene Clone  |
| 30 | STM1344-F181Q-R  | gatagcgtgcatCTGtggttcgaatga         | Gene Clone  |
| 31 | STM1344-F181S-F  | tcattcgaaccaAGCatgcacgctatc         | Gene Clone  |
| 32 | STM1344-F181S-R  | gatagcgtgcatGCTtggttcgaatga         | Gene Clone  |
| 33 | STM1344-A184E-F  | tcattcgaaccaCAGatgcacGAAatcggtgccag | Gene Clone  |
| 34 | STM1344-A184E-R  | ctgggcaacgatTTCgtg                  | Gene Clone  |
